# Supplementary material for: Bi2WO6: A highly chemoselective visible light photocatalyst toward aerobic oxidation of benzylic alcohols in water
Source: Royal Society of Chemistry journal article supplement (doi:10.1039/c3ra46383d), 2013-11-27
Supplement: c3ra46383d.pdf [file c3ra46383d.pdf]

## Supporting Information for the Manuscript

# $\text{Bi}_2\text{WO}_6$ : A highly chemoselective visible light photocatalyst toward aerobic oxidation of benzylic alcohols in water

Yanhui Zhang,<sup>†,‡</sup> Yi-Jun Xu<sup>†,‡,\*</sup>

<sup>†</sup> State Key Laboratory Breeding Base of Photocatalysis, College of Chemistry and Chemical Engineering, Fuzhou University, Fuzhou, 350002, P. R. China

<sup>‡</sup> College of Chemistry and Chemical Engineering, New Campus, Fuzhou University, Fuzhou, 350108, P. R. China

\*To whom correspondence should be addressed. E-mail Address: [yjxu@fzu.edu.cn](mailto:yjxu@fzu.edu.cn)

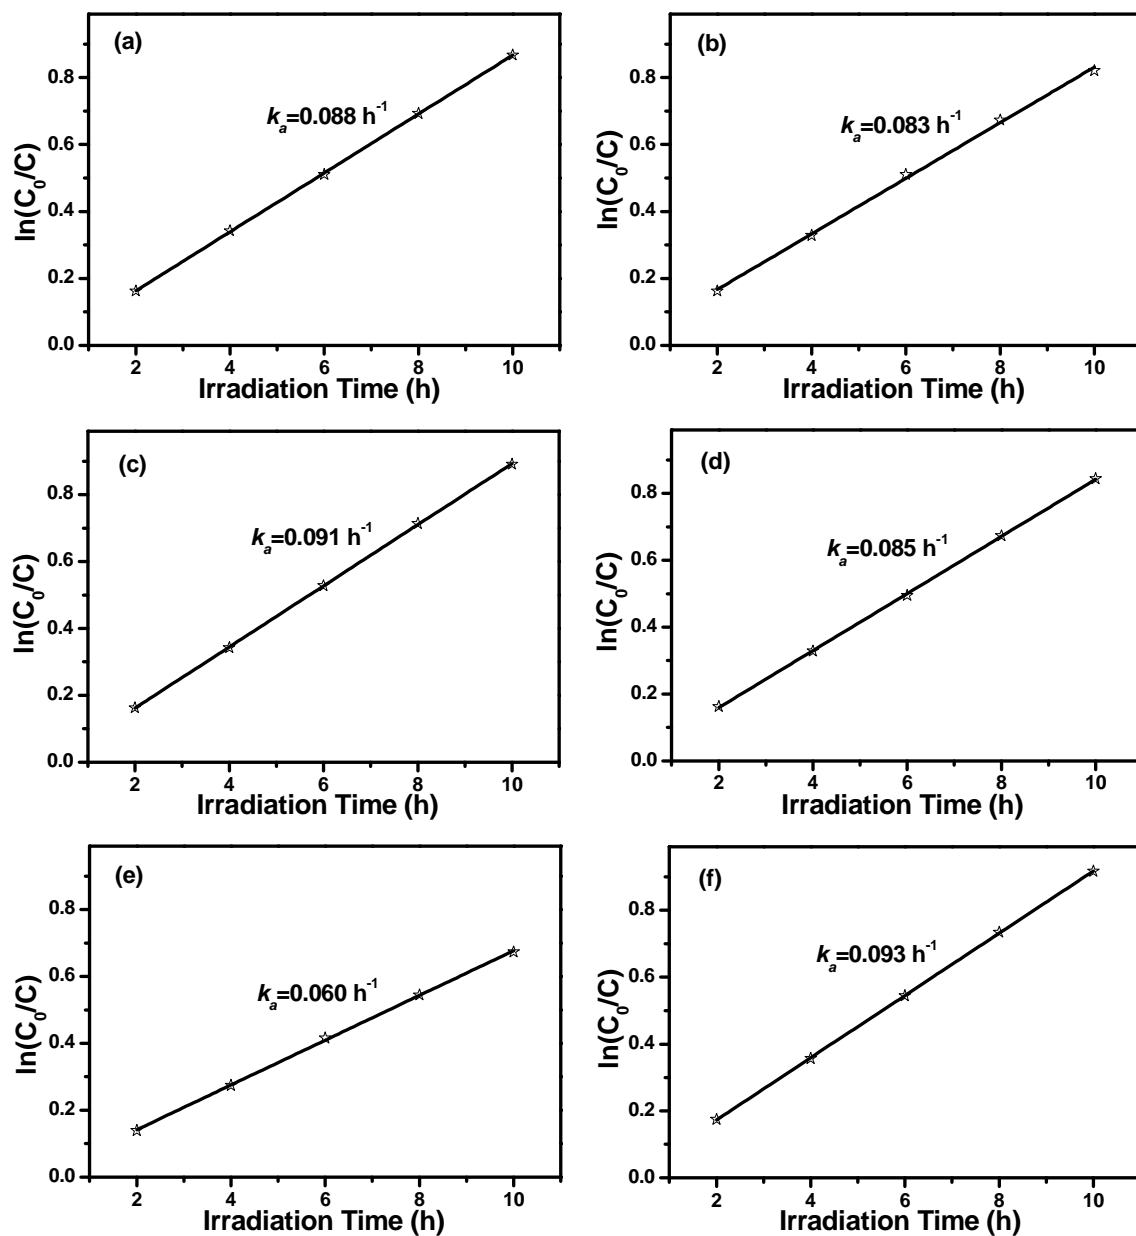

**Fig. S1** The kinetic rate constant for aerobic oxidation of benzylic alcohols to corresponding benzylic aldehydes in water over  $\text{Bi}_2\text{WO}_6$  under mild conditions; (a) benzyl alcohol; (b) *p*-methyl benzyl alcohol; (c) *p*-methoxyl benzyl alcohol; (d) *p*-nitro benzyl alcohol; (e) *p*-chloro benzyl alcohol; (f) *p*-fluoro benzyl alcohol.

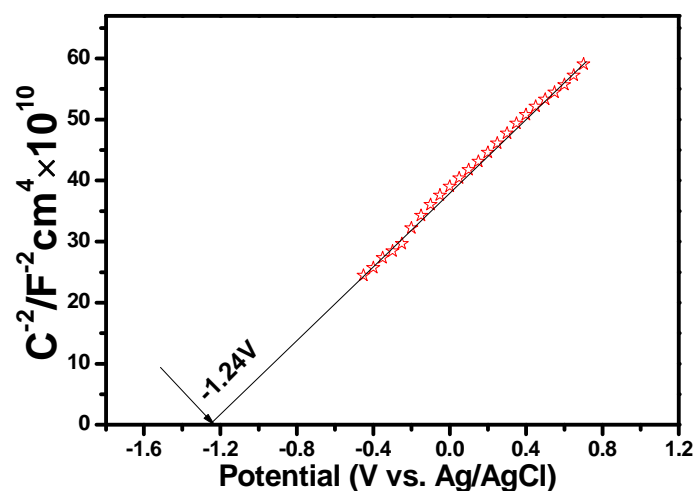

**Fig. S2** Mott-Schottky plots for Bi<sub>2</sub>WO<sub>6</sub> in 0.2 M Na<sub>2</sub>SO<sub>4</sub> aqueous solution (pH=6.8).

**Table S1.** Photocatalytic selective oxidation of various benzylic alcohols to corresponding aldehydes over flower-like Bi<sub>2</sub>WO<sub>6</sub> in benzotrifluoride (BTF) under visible light irradiation for 10 h.

| Entry | Substrate | Product | Conversion (%) | Selectivity (%) |
|-------|-----------|---------|----------------|-----------------|
| 1     |           |         | 57             | 99              |
| 2     |           |         | 56             | 98              |
| 3     |           |         | 58             | 98              |
| 4     |           |         | 53             | 98              |
| 5     |           |         | 42             | 96              |
| 6     |           |         | 59             | 96              |

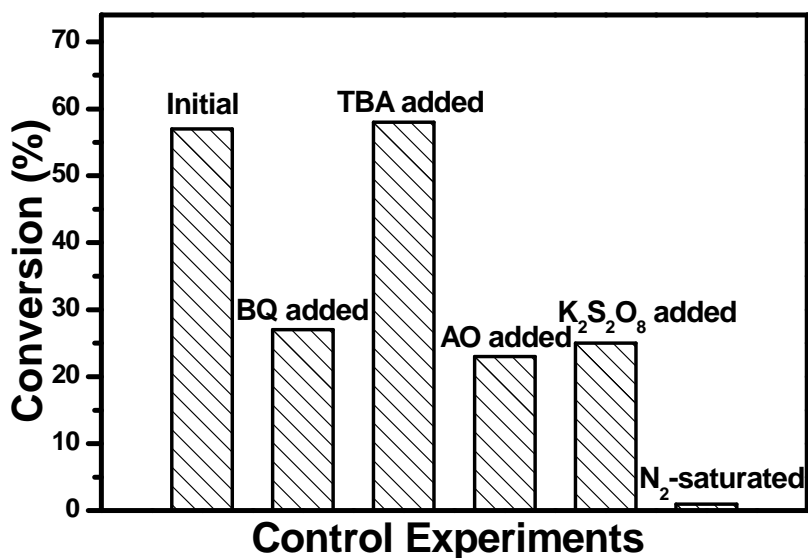

**Fig. S3** Controlled experiments of photocatalytic selective oxidation of benzyl alcohol in the presence of benzoquinone (BQ, scavenger for superoxide radicals), *tert*-butyl alcohol (TBA, scavenger for hydroxyl radicals), ammonium oxalate (AO, scavenger for holes), K<sub>2</sub>S<sub>2</sub>O<sub>8</sub> (scavenger for electrons), or N<sub>2</sub>-saturated condition over the flower-like Bi<sub>2</sub>WO<sub>6</sub> in benzotrifluoride (BTF) under visible light irradiation for 10 h.
